# Supplementary material for: Exploring Intestinal Microbiome of Heteropneustes fossilis (Bloch): A Metagenomic Approach
Source: Research Square preprint supplement (doi:10.21203/rs.3.rs-6555641/v1), 2025-05-06
Supplement: Supplementary file 2 [file db501d897a489ccfd29fd99d.docx]

**Exploring Intestinal Microbiome of *Heteropneustes fossilis* (Bloch): A Metagenomic Approach**

Pritish Mitra1, Asish Mandal1 Sabyasachi Chatterjee1 *

1*Post Graduate Department of Botany, Ramananda College, Bishnupur, Bankura-722122, West Bengal, India

**Corresponding author’s e-mail:** schatterjeebiotech@gmail.com

**Supplementary** **table 1:** Effect of different physiological conditions on bacterial growth.

| Name | Tolerance to temperature | Optimum temperature | Tolerance to pH | Optimum pH | Tolerance to NaCl concentration | Optimum NaCl concentration |
| --- | --- | --- | --- | --- | --- | --- |
| ASP1 | 20 - 50℃ | 30 - 40℃ | 4 - 9 | 7 | 1% - 7% | 1% |
| ASP2 | 20 - 50℃ | 30 - 40℃ | 4 - 9 | 8 | 1% - 7% | 1% |
| ASP3 | 20 - 50℃ | 30 - 40℃ | 4 - 9 | 7 | 1% - 7% | 1% |
| ASP4 | 20 - 50℃ | 30 - 40℃ | 4 - 9 | 7 | 1% - 7% | 1% |
| ASP5 | 20 - 50℃ | 30 - 40℃ | 4 - 9 | 7 | 1% - 9% | 1% |
| ASP6 | 20 - 50℃ | 30 - 40℃ | 3 - 9 | 7 | 1% - 9% | 1% |
| ASP7 | 30 - 50℃ | 30 - 40℃ | 4 - 9 | 7 | 1% - 6% | 1% |
| ASP8 | 20 - 50℃ | 30 - 40℃ | 3 - 9 | 7 | 1% - 8% | 1% |
| ASP9 | 20 - 50℃ | 30 - 40℃ | 3 - 9 | 7 | 1% - 9% | 1% |
| ASP10 | 20 - 50℃ | 30 - 40℃ | 3 - 9 | 7 | 1% - 9% | 1% |
| ASP11 | 20 - 40℃ | 30 - 40℃ | 4 - 9 | 7 | 1% - 6% | 1% |
| ASP12 | 30 - 50℃ | 30 - 40℃ | 4 - 9 | 7 | 1% - 7% | 1% |
| ASP13 | 20 - 50℃ | 30 - 40℃ | 3 - 9 | 7 | 1% - 9% | 1% |
| ASP14 | 30 - 50℃ | 30 - 40℃ | 3 - 9 | 7 | 1% - 8% | 1% |
| ASP15 | 30 - 40℃ | 30 - 40℃ | 4 - 9 | 7 | 1% - 6% | 1% |
| ASP16 | 20 - 40℃ | 30 - 40℃ | 4 - 8 | 7 | 1% - 6% | 1% |
| ASP17 | 30 - 50℃ | 30 - 40℃ | 3 - 8 | 7 | 1% - 6% | 1% |
| ASP18 | 20 - 50℃ | 30 - 40℃ | 4 - 9 | 7 | 1% - 9% | 1% |
| ASP19 | 20 - 50℃ | 30 - 40℃ | 4 - 9 | 7 | 1% - 8% | 1% |
| ASP20 | 20 - 50℃ | 30 - 40℃ | 4 - 9 | 7 | 1% - 8% | 1% |

**Supplementary** **table 2:** Biochemical characteristics of the isolates.

| **Name** | **Indole test** | **MR test** | **VP test** | **Citrate utilization test** | **Urea hydrolysis test** | **Oxidase test** | **Catalase test** | **Amylase test** | **Protease test** | **Nitrate reduction test** |
| --- | --- | --- | --- | --- | --- | --- | --- | --- | --- | --- |
| ASP1 | -ve | +ve | -ve | +ve | +ve | -ve | -ve | -ve | -ve | +ve |
| ASP2 | -ve | -ve | +ve | +ve | +ve | +ve | +ve | -ve | -ve | +ve |
| ASP3 | +ve | +ve | -ve | +ve | -ve | -ve | +ve | -ve | -ve | +ve |
| ASP4 | +ve | -ve | +ve | +ve | -ve | -ve | +ve | +ve | -ve | +ve |
| ASP5 | +ve | -ve | +ve | -ve | -ve | -ve | +ve | +ve | +ve | +ve |
| ASP6 | -ve | -ve | +ve | -ve | +ve | -ve | +ve | +ve | +ve | +ve |
| ASP7 | +ve | -ve | +ve | +ve | -ve | -ve | +ve | +ve | +ve | +ve |
| ASP8 | -ve | -ve | +ve | +ve | +ve | -ve | +ve | +ve | +ve | +ve |
| ASP9 | -ve | +ve | -ve | -ve | +ve | -ve | +ve | +ve | +ve | +ve |
| ASP10 | -ve | +ve | -ve | +ve | +ve | +ve | +ve | +ve | +ve | +ve |
| ASP11 | -ve | +ve | -ve | +ve | +ve | -ve | -ve | +ve | -ve | -ve |
| ASP12 | -ve | +ve | -ve | +ve | -ve | -ve | +ve | -ve | +ve | +ve |
| ASP13 | -ve | -ve | +ve | +ve | +ve | +ve | +ve | +ve | +ve | +ve |
| ASP14 | +ve | +ve | -ve | +ve | +ve | +ve | +ve | +ve | +ve | +ve |
| ASP15 | -ve | -ve | +ve | +ve | +ve | -ve | -ve | -ve | +ve | +ve |
| ASP16 | -ve | -ve | +ve | +ve | -ve | -ve | +ve | -ve | -ve | +ve |
| ASP17 | +ve | -ve | +ve | +ve | -ve | -ve | +ve | -ve | -ve | +ve |
| ASP18 | +ve | +ve | -ve | -ve | +ve | +ve | +ve | +ve | +ve | +ve |
| ASP19 | +ve | +ve | -ve | +ve | -ve | -ve | +ve | -ve | -ve | +ve |
| ASP20 | -ve | +ve | -ve | +ve | +ve | -ve | +ve | +ve | +ve | +ve |

‘+ve’ positive; ‘-ve’ negative

**Supplementary** **table 3:** Result of sugar fermentation by the isolates utilizing given sugars.

| Name | Sucrose | Dextrose | Fructose | Maltose | Mannitol | Starch | Lactose |
| --- | --- | --- | --- | --- | --- | --- | --- |
| ASP1 | + | + | - | + | + | - | + |
| ASP2 | - | + | + | + | + | - | - |
| ASP3 | - | + | + | + | - | - | - |
| ASP4 | + | + | + | + | + | + | - |
| ASP5 | + | + | - | + | - | + | - |
| ASP6 | + | + | + | + | + | + | - |
| ASP7 | + | + | + | + | + | + | - |
| ASP8 | + | + | + | + | + | - | + |
| ASP9 | + | + | + | + | - | + | - |
| ASP10 | + | + | + | + | + | + | - |
| ASP11 | + | + | + | + | - | - | + |
| ASP12 | - | + | + | - | + | - | - |
| ASP13 | - | + | - | + | - | + | - |
| ASP14 | - | + | - | + | - | + | - |
| ASP15 | + | + | + | + | + | - | + |
| ASP16 | + | + | + | + | - | - | - |
| ASP17 | - | + | + | + | - | - | - |
| ASP18 | + | + | - | - | - | + | - |
| ASP19 | + | + | - | - | - | - | - |
| ASP20 | - | - | + | - | + | + | - |

‘+’ positive; ‘-’ negative

**Supplementary** **table 4:** Annotation of most common intestinal species

| Species name | Sequence length | Species name | Sequence length |
| --- | --- | --- | --- |
| *Atopobium vaginae* | 301 | *Prevotella melaninogenica* | 301 |
| *Trueperella bonasi* | 301 | *Prevotella nanceiensis* | 301 |
| *Bifidobacterium catenulatum* | 301 | *Prevotella nigrescens* | 301 |
| *Gardnerella vaginalis* | 301 | *Prevotella timonensis* | 301 |
| *Corynebacterium imitans* | 301 | *Flavobacterium pedocola* | 301 |
| *Corynebacterium appendicis* | 301 | *Vibrionimonas magnilacihabitans* | 301 |
| *Corynebacterium stationis* | 301 | *Chitinophaga ginsengisegetis* | 301 |
| *Corynebacterium accolens* | 301 | *Hydrobacter penzbergensis* | 301 |
| *Corynebacterium lipophiloflavum* | 301 | *Bacillus asahii* | 301 |
| *Corynebacterium glaucum* | 301 | *Bacillus cereus* | 301 |
| *Corynebacterium minutissimum* | 301 | *Bacillus mycoides* | 301 |
| *Corynebacterium jeikeium* | 301 | *Bacillus coagulans* | 301 |
| *Dietzia cinnamea* | 301 | *Bacillus bataviensis* | 301 |
| *Mycobacterium aubagnense* | 301 | *Bacillus sinesaloumensis* | 301 |
| *Mycobacterium confluentis* | 301 | *Bacillus timonensis* | 301 |
| *Gordonia terrae* | 301 | *Bacillus jeotgali* | 301 |
| *Lawsonella clevelandensis* | 301 | *Bacillus licheniformis* | 301 |
| *Blastococcus aggregatus* | 301 | *Bacillus luciferensis* | 301 |
| *Geodermatophilus obscurus* | 301 | *Bacillus niacini* | 301 |
| *Jatrophihabitans endophyticus* | 301 | *Bacillus pumilus* | 301 |
| *Angustibacter speluncae* | 301 | *Bacillus litoralis* | 301 |
| *Labedella gwakjiensis* | 301 | *Bacillus subtilis* | 301 |
| *Kocuria turfanensis* | 301 | *Gracilibacillus bigeumensis* | 301 |
| *Chryseoglobus frigidaquae* | 301 | *Brevibacillus levickii* | 301 |
| *Cellulomonas massiliensis* | 301 | *Paenibacillus zeae* | 301 |
| *Agromyces mediolanus* | 301 | *Bacillus decisifrondis* | 301 |
| *Rothia dentocariosa* | 301 | *Psychrobacillus soli* | 301 |
| *Arthrobacter pascens* | 301 | *Kurthia zopfii* | 301 |
| *Nocardioides ginkgobilobae* | 301 | *Lysinibacillus sphaericus* | 301 |
| *Nocardioides kribbensis* | 301 | *Rummeliibacillus pycnus* | 301 |
| *Streptomyces bobili* | 301 | *Staphylococcus haemolyticus* | 301 |
| *Streptomyces guanduensis* | 301 | *Macrococcus caseolyticus* | 301 |
| *Streptomyces roseolilacinus* | 301 | *Staphylococcus epidermidis* | 301 |
| *Microbispora hainanensis* | 301 | *Staphylococcus capitis* | 301 |
| *Bacteroides xylanisolvens* | 301 | *Staphylococcus saprophyticus* | 301 |
| *Bacteroides acidifaciens* | 301 | *Staphylococcus xylosus* | 301 |
| *Bacteroides caccae* | 301 | *Staphylococcus hominis* | 301 |
| *Bacteroides vulgatus* | 301 | *Staphylococcus aureus* | 301 |
| *Bacteroides coprocola* | 301 | *Aerococcus christensenii* | 301 |
| *Bacteroides uniformis* | 301 | *Aerococcus viridans* | 301 |
| *Porphyromonas uenonis* | 301 | *Dolosicoccus paucivorans* | 301 |
| *Porphyromonas bennonis* | 301 | *Facklamia ignava* | 301 |
| *Prevotella bivia* | 301 | *Enterococcus faecium* | 301 |
| *Prevotella buccalis* | 301 | *Enterococcus faecalis* | 301 |
| *Prevotella colorans* | 301 | *Enterococcus pseudoavium* | 301 |
| *Prevotella copri* | 301 | *Enterococcus mundtii* | 301 |
| *Prevotella corporis* | 301 | *Streptococcus anginosus* | 301 |
| *Prevotella disiens* | 301 | *Streptococcus equinus* | 301 |
| *Lactobacillus agilis* | 301 | *Streptococcus pneumoniae* | 301 |
| *Lactobacillus buchneri* | 301 | *Streptococcus thermophilus* | 301 |
| *Lactobacillus caviae* | 301 | *Clostridium amazonense* | 301 |
| *Lactobacillus coleohominis* | 301 | *Clostridium beijerinckii* | 301 |
| *Lactobacillus gasseri* | 301 | *Clostridium botulinum_E* | 301 |
| *Lactobacillus johnsonii* | 301 | *Clostridium butyricum* | 301 |
| *Lactobacillus hominis* | 301 | *Clostridium carnis* | 301 |
| *Lactobacillus helveticus* | 301 | *Clostridium celatum* | 301 |
| *Lactobacillus iners* | 301 | *Clostridium chartatabidum* | 301 |
| *Lactobacillus psittaci* | 301 | *Clostridium chromiireducens* | 301 |
| *Lactobacillus jensenii* | 301 | *Clostridium huakuii* | 301 |
| *Lactobacillus fornicalis* | 301 | *Clostridium punense* | 301 |
| *Lactobacillus mucosae* | 301 | *Clostridium magnum* | 301 |
| *Lactobacillus casei* | 301 | *Clostridium nitrophenolicum* | 301 |
| *Lactobacillus plantarum* | 301 | *Clostridium paraputrificum* | 301 |
| *Lactobacillus reuteri* | 301 | *Clostridium perfringens* | 301 |
| *Lactobacillus ruminis* | 301 | *Clostridium quinii* | 301 |
| *Pediococcus acidilactici* | 301 | *Clostridium sardiniense* | 301 |
| *Leuconostoc citreum* | 301 | *Clostridium subterminale* | 301 |
| *Leuconostoc lactis* | 301 | *Clostridium tarantellae* | 301 |
| *Weissella confusa* | 301 | *Clostridium chauvoei* | 301 |
| *Weissella paramesenteroides* | 301 | *Clostridium ventriculi* | 301 |
| *Weissella ghanensis* | 301 | *Clostridium moniliforme* | 301 |
| *Lactococcus formosensis* | 301 | *Agathobacter rectalis* | 301 |
| *Lactococcus lactis* | 301 | *Blautia wexlerae* | 301 |
| *Peptostreptococcus stomatis* | 301 | *Dorea longicatena* | 301 |
| *Romboutsia lituseburensis* | 301 | *Intestinibacter bartlettii* | 301 |
| *Romboutsia sedimentorum* | 301 | *Eubacterium tenue* | 301 |
| *Romboutsia timonensis* | 301 | *Paraclostridium benzoelyticum* | 301 |
| *Terrisporobacter petrolearius* | 301 | *Peptoniphilus grossensis* | 301 |
| *Terrisporobacter mayombei* | 301 | *Peptoniphilus lacrimalis* | 301 |
| *Paraclostridium benzoelyticum* | 301 | *Cetobacterium somerae* | 301 |
| *Gemmiger formicilis* | 301 | *Fusobacterium nucleatum* | 301 |
| *Eubacterium saphenum* | 301 | *Leptotrichia amnionii* | 301 |
| *Faecalibaculum rodentium* | 301 | *Sneathia sanguinegens* | 301 |
| *Holdemanella biformis* | 301 | *Victivallis vadensis* | 301 |
| *Turicibacter sanguinis* | 301 | *Singulisphaera rosea* | 301 |
| *Propionispira arcuata* | 301 | *Brevundimonas naejangsanensis* | 301 |
| *Dialister propionicifaciens* | 301 | *Brevundimonas lenta* | 301 |
| *Megasphaera indica* | 301 | *Brevundimonas aurantiaca* | 301 |
| *Megasphaera massiliensis* | 301 | *Brevundimonas vesicularis* | 301 |
| *Veillonella dispar* | 301 | *Brevundimonas viscosa* | 301 |
| *Veillonella montpellierensis* | 301 | *Caulobacter vibrioides* | 301 |
| *Anaerococcus murdochii* | 301 | *Rhodoblastus acidophilus* | 301 |
| *Anaerococcus tetradius* | 301 | *Afipia broomeae* | 301 |
| *Bacteroides coagulans* | 301 | *Bradyrhizobium liaoningense* | 301 |
| *Fenollaria massiliensis* | 301 | *Bradyrhizobium cytisi* | 301 |
| *Finegoldia magna* | 301 | *Bradyrhizobium japonicum* | 301 |
| *Murdochiella asaccharolytica* | 301 | *Rhodopseudomonas pentothenatexigens* | 301 |
| *Peptoniphilus coxii* | 301 | *Burkholderia cepacia* | 301 |
| *Brucella abortus* | 301 | *Achromobacter pulmonis* | 301 |
| *Pedomicrobium americanum* | 301 | *Ralstonia insidiosa* | 301 |
| *Methylobacterium mesophilicum* | 301 | *Achromobacter xylosoxidans* | 301 |
| *Methylobacterium dankookense* | 301 | *Achromobacter denitrificans* | 301 |
| *Methylobacterium hispanicum* | 301 | *Curvibacter lanceolatus* | 301 |
| *Methylobacterium extorquens* | 301 | *Pandoraea sputorum* | 301 |
| *Methylobacterium gregans* | 301 | *Ralstonia pickettii* | 301 |
| *Mesorhizobium huakuii* | 301 | *Achromobacter ruhlandii* | 301 |
| *Rhizobium leguminosarum* | 301 | *Achromobacter marplatensis* | 301 |
| *Rhizobium radiobacter* | 301 | *Comamonas testosteroni* | 301 |
| *Rhizobium pusense* | 301 | *Aquabacterium parvum* | 301 |
| *Rhizobium alvei* | 301 | *Limnobacter thiooxidans* | 301 |
| *Shinella fusca* | 301 | *Burkholderia multivorans* | 301 |
| *Shinella granuli* | 301 | *Cupriavidus metallidurans* | 301 |
| *Xanthobacter flavus* | 301 | *Comamonas aquatica* | 301 |
| *Alsobacter metallidurans* | 301 | *Cupriavidus pauculus* | 301 |
| *Bosea lathyri* | 301 | *Variovorax guangxiensis* | 301 |
| *Bosea minatitlanensis* | 301 | *Pelomonas saccharophila* | 301 |
| *Bosea thiooxidans* | 301 | *Acidovorax radicis* | 301 |
| *Phreatobacter oligotrophus* | 301 | *Ideonella dechloratans* | 301 |
| *Prosthecomicrobium hirschii* | 301 | *Oligella ureolytica* | 301 |
| *Polymorphum gilvum* | 301 | *Vogesella perlucida* | 301 |
| *Paracoccus aminovorans* | 301 | *Neisseria elongata* | 301 |
| *Rubellimicrobium aerolatum* | 301 | *Dechloromonas denitrificans* | 301 |
| *Rubellimicrobium roseum* | 301 | *Zoogloea resiniphila* | 301 |
| *Acetobacter orientalis* | 301 | *Campylobacter ureolyticus* | 301 |
| *Acetobacter pasteurianus* | 301 | *Campylobacter hominis* | 301 |
| *Gluconobacter frateurii* | 301 | *Aeromonas taiwanensis* | 301 |
| *Azospirillum melinis* | 301 | *Aeromonas caviae* | 301 |
| *Azospirillum picis* | 301 | *Aeromonas hydrophila* | 301 |
| *Novispirillum itersonii* | 301 | *Aeromonas veronii* | 301 |
| *Reyranella aquatilis* | 301 | *Haemophilus piscium* | 301 |
| *Reyranella graminifolii* | 301 | *Buttiauxella gaviniae* | 301 |
| *Reyranella massiliensis* | 301 | *Citrobacter portucalensis* | 301 |
| *Blastomonas natatoria* | 301 | *Citrobacter murliniae* | 301 |
| *Novosphingobium bradum* | 301 | *Citrobacter werkmanii* | 301 |
| *Novosphingobium capsulatum* | 301 | *Citrobacter freundii* | 301 |
| *Novosphingobium flavum* | 301 | *Phytobacter ursingii* | 301 |
| *Altererythrobacter deserti* | 301 | *Kluyvera georgiana* | 301 |
| *Novosphingobium sediminicola* | 301 | *Cronobacter dublinensis* | 301 |
| *Novosphingobium subterraneum* | 301 | *Enterobacter kobei* | 301 |
| *Sphingobium amiense* | 301 | *Enterobacter tabaci* | 301 |
| *Sphingobium olei* | 301 | *Shigella dysenteriae* | 301 |
| *Sphingobium lactosutens* | 301 | *Klebsiella singaporensis* | 301 |
| *Sphingobium naphthae* | 301 | *Kluyvera ascorbata* | 301 |
| *Sphingobium xenophagum* | 301 | *Escherichia hermannii* | 301 |
| *Sphingobium yanoikuyae* | 301 | *Kosakonia arachidis* | 301 |
| *Sphingomonas daechungensis* | 301 | *Kosakonia cowanii* | 301 |
| *Sphingomonas aquatilis* | 301 | *Kosakonia pseudosacchari* | 301 |
| *Sphingomonas desiccabilis* | 301 | *Phytobacter diazotrophicus* | 301 |
| *Sphingomonas leidyi* | 301 | *Plesiomonas shigelloides* | 301 |
| *Cedecea neteri* | 301 | *Rahnella woolbedingensis* | 301 |
| *Shimwellia pseudoproteus* | 301 | *Serratia proteamaculans* | 301 |
| *Yokenella regensburgei* | 301 | *Serratia marcescens* | 301 |
| *Erwinia aphidicola* | 301 | *Serratia ureilytica* | 301 |
| *Pantoea eucrina* | 301 | *Erwinia aphidicola* | 301 |
| *Pantoea deleyi* | 301 | *Enterobacter hormaechei* | 301 |
| *Curtobacterium plantarum* | 301 | *Enterobacter cancerogenus* | 301 |
| *Pantoea dispersa* | 301 | *Brenneria populi* | 301 |
| *Pantoea ananatis* | 301 | *Pantoea stewartii* | 301 |
| *Pantoea stewartii* | 301 | *Pantoea vagans* | 301 |
| *Edwardsiella tarda* | 301 | *Chromohalobacter israelensis* | 301 |
| *Morganella morganii* | 301 | *Halomonas smyrnensis* | 301 |
| *Proteus hauseri* | 301 | *Aggregatibacter aphrophilus* | 301 |
| *Pectobacterium carotovorum* | 301 | *Acinetobacter guillouiae* | 301 |
| *Rahnella aquatilis* | 301 | *Acinetobacter kookii* | 301 |
| *Pseudomonas plecoglossicida* | 301 | *Acinetobacter nosocomialis* | 301 |
| *Pseudomonas hunanensis* | 301 | *Acinetobacter schindleri* | 301 |
| *Pseudomonas fluorescens* | 301 | *Acinetobacter calcoaceticus* | 301 |
| *Pseudomonas fluvialis* | 301 | *Acinetobacter vivianii* | 301 |
| *Pseudomonas yamanorum* | 301 | *Alkanindiges illinoisensis* | 301 |
| *Pseudomonas migulae* | 301 | *Psychrobacter fulvigenes* | 301 |
| *Pseudomonas helleri* | 301 | *Pseudomonas composti* | 301 |
| *Pseudomonas oryzihabitans* | 301 | *Pseudomonas monteilii* | 301 |
| *Pseudomonas fragi* | 301 | *Pseudomonas benzenivorans* | 301 |
| *Pseudomonas sihuiensis* | 301 | *Silanimonas algicola* | 301 |
| *Pseudomonas stutzeri* | 301 | *Stenotrophomonas bentonitica* | 301 |
| *Pseudomonas extremorientalis* | 301 | *Stenotrophomonas maltophilia* | 301 |
| *Pseudomonas xiamenensis* | 301 | *Pseudomonas geniculata* | 301 |
| *Pseudomonas synxantha* | 301 | *Vulcaniibacterium thermophilum* | 301 |
| *Pseudomonas panacis* | 301 | *Xanthomonas campestris* | 301 |
| *Pseudomonas alcaligenes* | 301 | *Jonquetella anthropi* | 301 |
| *Pseudomonas mendocina* | 301 | *Ureaplasma parvum* | 301 |
| *Pseudomonas brenneri* | 301 | *Mycoplasma hominis* | 301 |
| *Pseudomonas oleovorans* | 301 | *Ureaplasma urealyticum* | 301 |
| *Pseudomonas alcaliphila* | 301 |  |  |


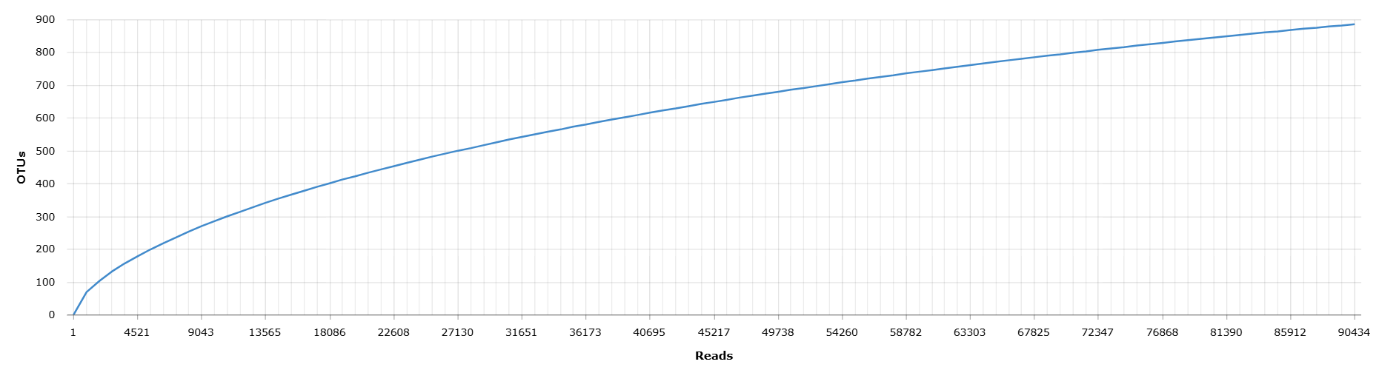


**A**


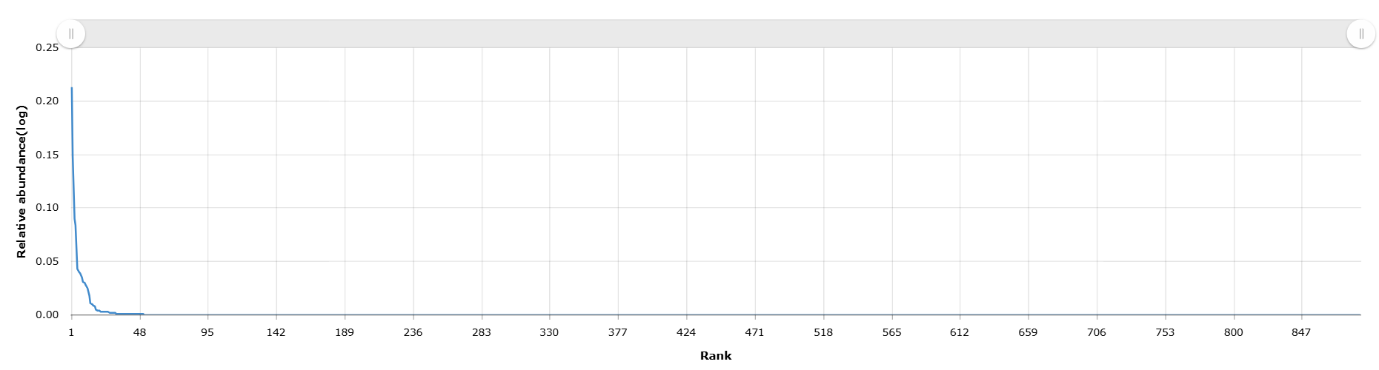


**B**

**Supplementary fig. 1:** Refraction plot (A) and rank abundance plot (B) help to analyse ecological community of gut flora of *Heteropneustes fossilis*

**Supplementary fig. 2:** Relative abundance of antibiotic resistance genes in the gut flora of *H. fossilis*
