# Supplementary figures and images for: Exploring Intestinal Microbiome of Heteropneustes fossilis (Bloch): A Metagenomic Approach
Source: Research Square preprint supplement (doi:10.21203/rs.3.rs-6555641/v1), 2025-05-06

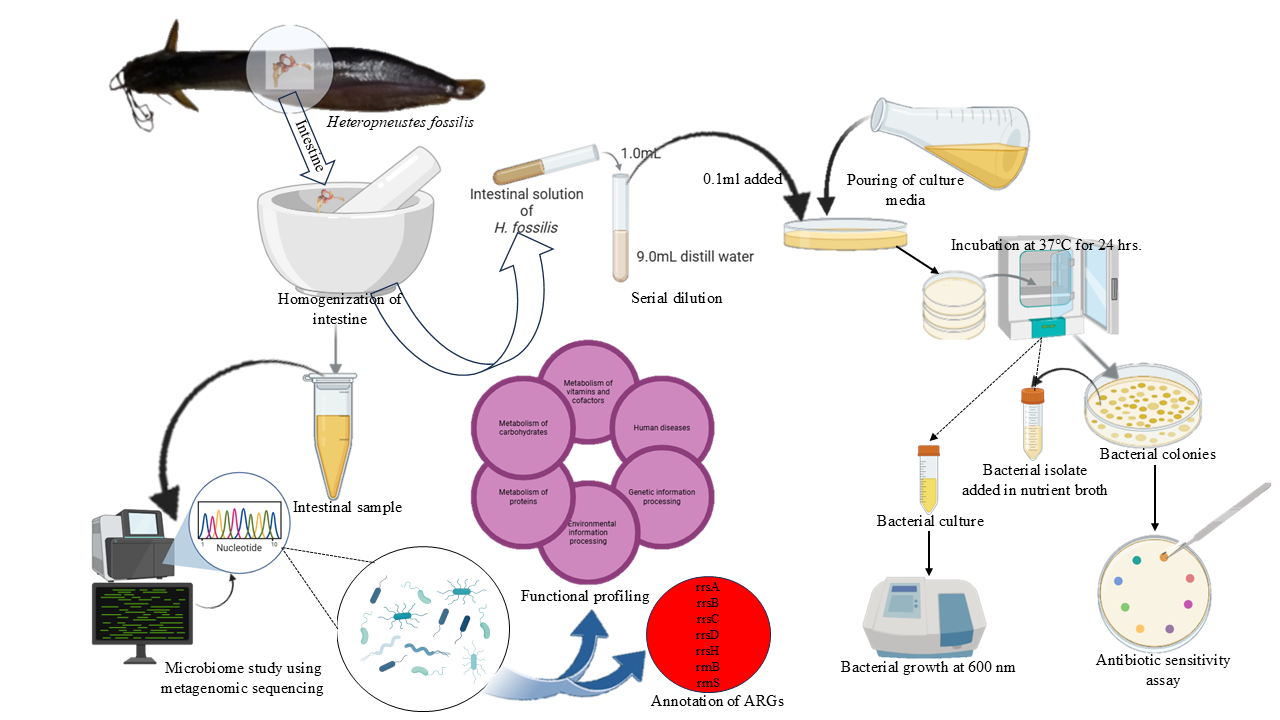

Supplement: Supplementary file 1 [file 1eb843a2f8093294ea79f615.docx]
